# Supplementary material for: A label-free and fluorescence turn-on assay for sensitive detection of hyaluronidase based on hyaluronan-induced perylene self-assembly
Source: Royal Society of Chemistry journal article supplement (doi:10.1039/c8nj06343e), 2019-01-01
Supplement: c8nj06343e1.pdf [file c8nj06343e1.pdf]

*Electronic Supplementary Information*

**A label-free and fluorescence turn-on assay for sensitive detection of  
hyaluronidase based on hyaluronan-induced perylene self-assembly**

Lin Ma, Wenjuan Gao, Xue Han, Fengli Qu, Lian Xia and Rong-Mei Kong\*

*College of Chemistry and Chemical Engineering, Qufu Normal University, Qufu  
Shandong 273165, P. R. China.*

\* To whom correspondence should be addressed.

E-mail: [kongrongmei@126.com](mailto:kongrongmei@126.com)

Tel/fax: (+86) 537-4456301

## Experimental section

### Synthesis of PDI

The cationic perylene diimide derivative (PDI) was synthesized following the literature procedure.<sup>1</sup> Briefly, under nitrogen atmosphere, a mixture of perylene tetracarboxylic dianhydride (1.0 g, 2.42 mmol) and N, N-Dimethyl-1, 3-propanediamine (5 mL, 39.3 mmol) in 50 mL of isobutanol was stirred at 90 °C overnight. After filtering, the solid was washed twice with water and ethanol. The unreacted perylene tetracarboxylic dianhydride was then removed from the crude product by treating with 5% aqueous NaOH solution at 90 °C for 1 h. After filtering, washing with triply distilled water and ethanol, and drying under vacuum, 1.1 g of N, N-bis (propylenedimethylamine)-3, 4, 9, 10-perylenediimide was obtained as a red solid. It was added together with 1.5 mL of methyl iodide (24.1 mmol) to 50 mL of toluene, and heat to reflux for 3 h under nitrogen. The mixture was slowly brought to room temperature, and then filtered and washed with cool ether to give an iodide of compound 1 as a brown-red solid. The nitrate of compound 1 was further prepared by treating it with silver nitrate. It was characterized using <sup>1</sup>H NMR and MS analytical spectroscopic techniques, and the results agree well with the previously reported data.<sup>1</sup> <sup>1</sup>H NMR (DMSO-*d*<sub>6</sub>, 400 MHz, 80 °C), δ (ppm) = 2.18-2.25 (m, 4H), 3.09 (s, 18H), 3.47-3.52 (m, 4H), 4.20 (t, 4H, *J* = 6.6 Hz), 8.56 (d, 4H, *J* = 7.8 Hz), 8.84 (d, 4H, *J* = 7.9 Hz). MS(TOF) *m/e*: 295.2 [*M*<sup>2+</sup>/2].

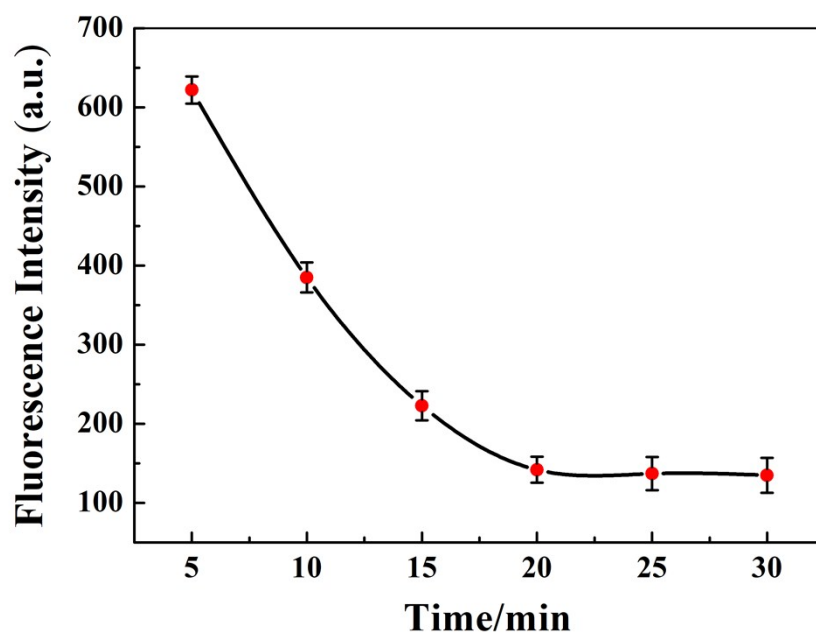

**Fig. S1** Effect of the self-assembly time on the fluorescence emission of HA-PDI nanoaggregates at 550 nm; [PDI] = 0.2  $\mu$ M, [HA] = 20  $\mu$ g/mL. The error bars were estimated from three replicate measurements.

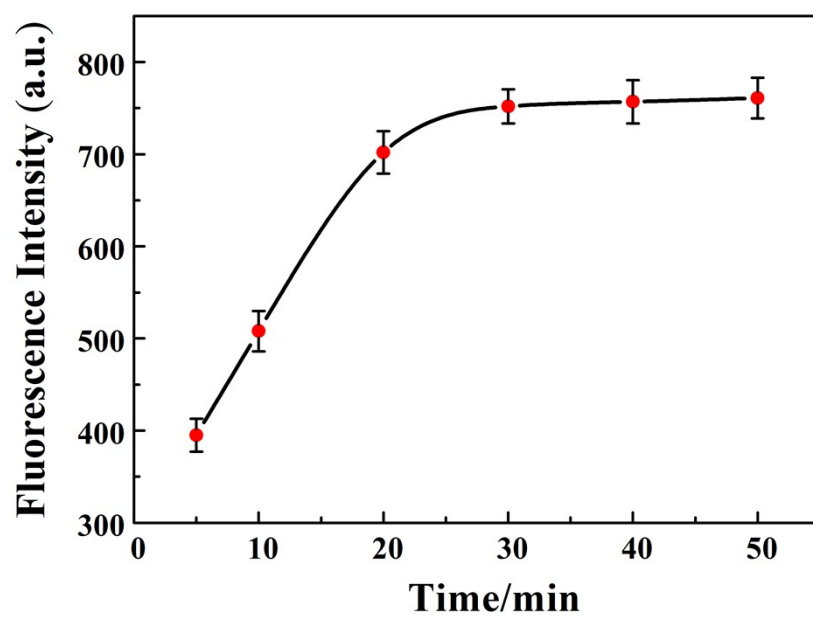

**Fig. S2** Effect of the enzymatic reaction time of HAase on the fluorescence emission of HA-PDI based assay system at 550 nm; [PDI] = 0.2  $\mu$ M, [HA] = 20  $\mu$ g/mL, [HAase] = 10 U/mL. The error bars were estimated from three replicate measurements.

**Table S1.** Comparison of various fluorescence methods for the detection of HAase.

| Probe                                                 | Linear range   | Detection limit | Ref.      |
|-------------------------------------------------------|----------------|-----------------|-----------|
| FITC-HA- AuNPs                                        | 1.25–50 U/mL   | 0.63 U/mL       | 2         |
| MoS <sub>2</sub> QDs/HA- AuNPs                        | 1-50 U/mL      | 0.7 U/mL        | 3         |
| Cationic conjugated polymer PFEP/HA-Dox complex       | 0-1.30 U/mL    | 0.075 U/mL      | 4         |
| Polyethylenimine-modified carbon dots (P-CDs)/HA-Doxs | 0–400 U/mL     | 0.65 U/mL       | 5         |
| Positively-charged pyrene analog (N-Py)/HA            | —              | 0.007 U/mL      | 6         |
| Carbon dots (CDs)/HA-AuNPs                            | 0.1–80 U/mL    | 0.06 U/mL       | 7         |
| Carbon dots (CDs)/HA                                  | 0.2-10000 U/mL | 0.1 U/mL        | 8         |
| Graphitic carbon nitride (g-CN) nanosheets/HA-AuNPs   | 0-0.015 U/mL   | 0.6 mU/mL       | 9         |
| HA-PDI                                                | 0.1-10 U/mL    | 0.03 U/mL       | this work |

## References

- [1] B. Wang, C. Yu, Fluorescence Turn-On Detection of a Protein through the Reduced Aggregation of a Perylene Probe, *Angew. Chem. Int. Ed.*, 2010, 49, 1485-1488.
- [2] D. Cheng, W. Han, K. Yang, Y. Song, M. Jiang, E. Song, One-step facile synthesis of hyaluronic acid functionalized fluorescent gold nanoprobe sensitive to hyaluronidase in urine specimen from bladder cancer patients, *Talanta*, 2014, 130, 408-414.
- [3] W. Gu, Y. Yan, C. Zhang, C. Ding, Y. Xian, One-Step Synthesis of Water-Soluble MoS<sub>2</sub> Quantum Dots via a Hydrothermal Method as a Fluorescent Probe for Hyaluronidase Detection, *ACS Appl. Mater. Interfaces*, 2016, 8, 11272-11279.
- [4] Y. Huang, C. Song, H. Li, R. Zhang, R. Jiang, X. Liu, G. Zhang, Q. Fan, L. Wang, W. Huang, Cationic Conjugated Polymer/Hyaluronan-Doxorubicin Complex for Sensitive Fluorescence Detection of Hyaluronidase and Tumor-Targeting Drug Delivery and Imaging, *ACS Appl. Mater. Interfaces*, 2015, 7, 21529-21537.
- [5] N. Gao, W. Yang, H. Nie, Y. Gong, J. Jing, L. Gao, X. Zhang, Turn-on theranostic fluorescent nanoprobe by electrostatic self-assembly of carbon dots with doxorubicin for targeted cancer cell imaging, in vivo hyaluronidase analysis, and targeted drug delivery, *Biosens. Bioelectron.*, 2017, 96, 300-307.
- [6] Q. Hu, F. Zeng, S. Wu, A ratiometric fluorescent probe for hyaluronidase detection via hyaluronan-induced formation of red-light emitting excimers, *Biosens. Bioelectron.*, 2016, 79, 776-783.
- [7] S. Liu, N. Zhao, Z. Cheng, H. Liu, Amino-functionalized Green Fluorescent Carbon Dots as Surface Energy Transfer Biosensors for Hyaluronidase, *Nanoscale*, 2015, 7, 6836-6842.

- [8] K. Yang, M. Liu, Y. Wang, S. Wang, H. Miao, L. Yang, X. Yang, Carbon dots derived from fungus for sensing hyaluronic acid and hyaluronidase, *Sensor. Actuat. B*, 2017, 251, 503-508.
- [9] J.W. Liu, Y.M. Wang, C.H. Zhang, L.Y. Duan, Z. Li, R.Q. Yu, J.H. Jiang, Tumor-Targeted Graphitic Carbon Nitride Nanoassembly for Activatable Two-Photon Fluorescence Imaging, *Anal. Chem.*, 2018, 90, 4649-4656.
